# Supplementary material for: Isoliquiritigenin Attenuates Atherogenesis in Apolipoprotein E-Deficient Mice
Source: MDPI journal article supplement (doi:10.3390/ijms17111932), 2016-11-18
Supplement: s1 [file s1]

# Supplementary Materials: Isoliquiritigenin Attenuates Atherogenesis in Apolipoprotein E-Deficient Mice

Fen Du, Quzhen Gesang, Jia Cao, Mei Qian, Li Ma, Dongfang Wu and Hong Yu

## Methods

### *In Vitro Cytotoxicity Test by MTT Assay*

The cytotoxicity of ISL was tested with a colorimetric assay by MTT assay. HeLa cells were seeded in 96-well microplates with  $5 \times 10^3$  cells per well and incubated with serum-free DMEM at 37 °C overnight before further treatment. The cells were treated with different concentrations of ISL (0–100 µg/mL, dissolved in 0.01% DMSO) or addition of 50 ng/mL LPS for 48 h, respectively. Cells supplied with culture media alone served as negative control and 0.01% DMSO was used as solvent control. MTT solution (0.5 mg/mL in PBS) was added for 4 h at 37 °C. The precipitates were dissolved in 150 µL DMSO and the absorbance (A) of each well was read at 570 nm by a microplate reader (BioTek, Winooski, VT, USA). The cell viability was defined as the percentage normalized with A<sub>570</sub> of the control cells.

**Table S1.** Oligonucleotide primers of mice genes used for quantitative real-time PCR.

| Genes          | Forward Primer           | Reverse Primer            |
|----------------|--------------------------|---------------------------|
| <i>18S</i>     | CGCGGTTCTATTTTGTGGT      | AGTCGGCATCGTTTATGGTC      |
| <i>IL-6</i>    | AGTTGCCTTCTGGGACTGA      | TCCACGATTTCAGAGAAC        |
| <i>TNFα</i>    | CACGCTCTTCTGCCTGCT3'     | GCTTGTCACCTCGGGGTTT       |
| <i>MCP-1</i>   | TGTCCCAAAGAAGCTGTAGT     | ACAGAAGTGCTTGAGGTGGT      |
| <i>ABCA1</i>   | GGAGCTGGGAAGTCAACAAC     | ACATGCTCTCTTCCCGTCAG      |
| <i>ABCG8</i>   | ACAAGGCTCACACAGATCTCTCA  | TATAATTGGTTCCCATTCCATACTG |
| <i>PPARγ</i>   | GGAAGCCCTTTGGTGACTTTATGG | GCAGCAGGTTGTCTTGATGTC     |
| <i>SR-BI</i>   | TTTCAGCAGGATCCATCTGGTGGA | AGTTCATGGGGATCCCAGTGAC    |
| <i>PON1</i>    | TGGTGGTAAACCATCCAGACTC   | TGTGATGGTTTTTCAGATGCAAG   |
| <i>LDLR</i>    | TGTGAAAATGACTCAGACGAAC   | GGAGATGCACTTGCCATCCT      |
| <i>LXRα</i>    | CTCAATGCCTGATGTTTCTCCT   | TCCAACCCTATCCCTAAAGCAA    |
| <i>CYP7A1</i>  | AAACTCCCTGTCATACCACAAAG  | TTCCATCACTTGGGTCTATGC     |
| <i>CYP27A1</i> | GACAACCTCCTTTGTGATTG     | GTGGTCTCTTATTGGGTACTTGC   |
| <i>FASN</i>    | CCTGGATAGCATTCCGAACCT    | AGCACATCTCGAAGGCTACACA    |

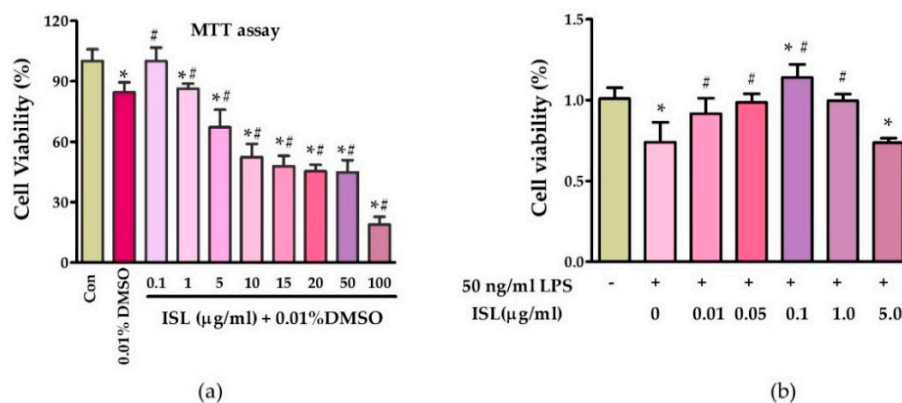

**Figure S1.** Cell viability by MTT assay. (a) The cytotoxicity of ISL. HeLa cells were treated with a series of concentrations of ISL (0–100 µg/mL, dissolved in 0.01% DMSO), then the viability was determined via MTT assay ( $n = 6-7$ ; \*  $p < 0.05$  vs. control group. #  $p < 0.05$  vs. 0.01% DMSO group); (b) the protective effect of ISL against LPS. The cells were treated with 50 ng/mL LPS and different concentrations of ISL, then cell viability was examined by MTT assay ( $n = 6-8$ ; \*  $p < 0.05$  vs. control group. #  $p < 0.05$  vs. LPS-induced group).

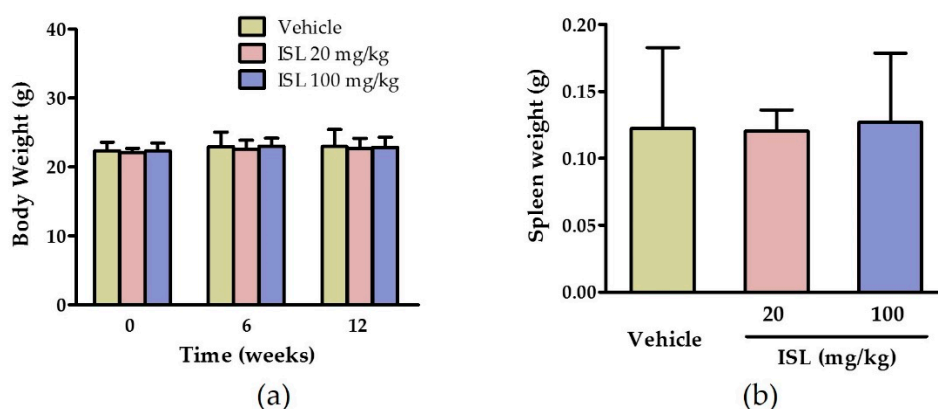

**Figure S2.** ISL does not cause in vivo toxicity in apoE<sup>-/-</sup> mice. Twenty-week-old female apoE<sup>-/-</sup> mice were fed an AIN76A Western diet supplemented with 0.5% CMC-Na or ISL (20 mg/kg/d, 100 mg/kg/d) for 12-week, and then sacrificed. Body weight of the apoE<sup>-/-</sup> mice (a) at various time points and spleen weight (b) at the endpoint were observed. Data are presented as mean  $\pm$  SD,  $n = 10$ .
